# Supplementary material
Source: publisher site journal article supplement (https://www.spandidos-publications.com/8572/downloadSupplementary)
Supplement: Supplementary file 1 [file downloadSupplementary]

Table SI. Primer sequences for genotyping.

| Primer type          | Sequence (5'-3')           |
|----------------------|----------------------------|
| Kdm6a-Flox           |                            |
| Forward              | TCTCTATGCACTGGATGTAT       |
| Reverse              | AAAAGATGTTAAGGGTTGTT       |
| R26-CAG-LSL-tdTomato |                            |
| Wild-type forward    | AAG GGA GCT GCA GTG GAG TA |
| Wild-type reverse    | CCG AAA ATC TGT GGG AAG TC |
| Mutant forward       | GGC ATT AAA GCA GCG TAT CC |
| Mutant reverse       | CTG TTC CTG TAC GGC ATG G  |
| Col2a1-CreERT2       |                            |
| Wild-type            | GAGTGA CTGCGGTTGGAAA       |
| Common               | GGAGGAAGACAAGTAGAGGAGG     |
| Mutant               | TGCGAACCTCATCACTCGTTGC     |

Kdm6a-Flox is a conditional knockout strain where essential exons of the Kdm6a gene are flanked by loxP sites. R26-CAG-LSL-tdTomato is a Cre-dependent reporter strain in which a loxP-flanked transcriptional stop cassette prevents the expression of the tdTomato fluorescent protein. Upon Cre-mediated recombination, tdTomato is expressed, permanently labeling Cre-active cells and their progeny. For the R26-CAG-LSL-tdTomato reporter allele, a four-primer strategy was used. Two independent primer pairs (wild-type forward/reverse and mutant forward/reverse) were used to separately amplify the wild-type and mutant DNA fragments, which avoids potential primer competition and yields optimal band clarity. Col2a1-CreERT2 expresses CreERT2 specifically in chondrocytes, driven by the Col2a1 promoter. CreERT2, tamoxifen-inducible Cre recombinase; Col2a1, collagen type II  $\alpha 1$  chain; Kdm6a, lysine demethylase 6A.

Table SII. Cell quality control metrics of the single-cell RNA sequencing sample at 10 days post-fracture.

| Sample | Number of cells before filtering | Number of cells after filtering | Cell retention rate after filtering, % | Median genes per cell before filtering | Median genes per cell after filtering |
|--------|----------------------------------|---------------------------------|----------------------------------------|----------------------------------------|---------------------------------------|
| WT3    | 14,355                           | 12,790                          | 89.10                                  | 1,500                                  | 1,452                                 |
| WT2    | 13,932                           | 11,623                          | 83.43                                  | 1,644                                  | 1,620                                 |
| WT1    | 14,591                           | 12,527                          | 85.85                                  | 1,720                                  | 1,668                                 |
| FX3    | 16,023                           | 13,221                          | 82.51                                  | 1,736                                  | 1,697                                 |
| FX2    | 11,832                           | 9,584                           | 81.00                                  | 1,769                                  | 1,784                                 |
| FX1    | 15,467                           | 13,642                          | 88.20                                  | 1,556                                  | 1,497                                 |

FX, Kdm6a conditional knockout mice; WT, wild-type.

Table SIII. Cell quality control metrics of the single-cell RNA sequencing sample at 21 days post-fracture.

| Sample | Number of cells before filtering | Number of cells after filtering | Cell retention rate after filtering, % | Median genes per cell before filtering | Median genes per cell after filtering |
|--------|----------------------------------|---------------------------------|----------------------------------------|----------------------------------------|---------------------------------------|
| WT3    | 8,369                            | 5,514                           | 65.89                                  | 791                                    | 939                                   |
| WT2    | 9,995                            | 7,211                           | 72.15                                  | 793                                    | 890                                   |
| WT1    | 7,691                            | 5,364                           | 69.74                                  | 909                                    | 1,043                                 |
| FX3    | 10,030                           | 7,702                           | 76.79                                  | 975                                    | 1,035                                 |
| FX2    | 9,414                            | 7,253                           | 77.04                                  | 1,076                                  | 1,191                                 |
| FX1    | 9,087                            | 6,540                           | 71.97                                  | 834                                    | 924                                   |

FX, Kdm6a conditional knockout mice; WT, wild-type.
